# Supplementary material for: Fabrication of a highly sensitive surface-enhanced Raman scattering substrate for monitoring the catalytic degradation of organic pollutants
Source: Royal Society of Chemistry journal article supplement (doi:10.1039/c5ta01974e), 2015-01-01
Supplement: c5ta01974e1.pdf [file c5ta01974e1.pdf]

**Supporting Information to:**

**Fabrication of a highly sensitive surface-enhanced Raman  
scattering substrate for monitoring of the catalytic degradation  
of organic pollutants**

*Wei Song<sup>a,b</sup>, Wei Ji<sup>a</sup>, Sanpon Vantasin<sup>a</sup>, Ichiro Tanabe<sup>a</sup>, Bing Zhao<sup>\*b</sup>, and Yukihiro Ozaki<sup>\*a</sup>*

<sup>a</sup> Department of Chemistry, School of Science and Technology, Kwansai Gakuin University, Sanda,  
Hyogo 669-1337, Japan

<sup>b</sup> State Key Laboratory of Supramolecular Structure and Materials, Jilin University, Changchun  
130012, P. R. China

\* To whom correspondence should be addressed.

E-mail: [zhaob@jlu.edu.cn](mailto:zhaob@jlu.edu.cn); [ozaki@kwansai.ac.jp](mailto:ozaki@kwansai.ac.jp); Tel : +81 79 565 8349; Fax: +81 79 565 9077.

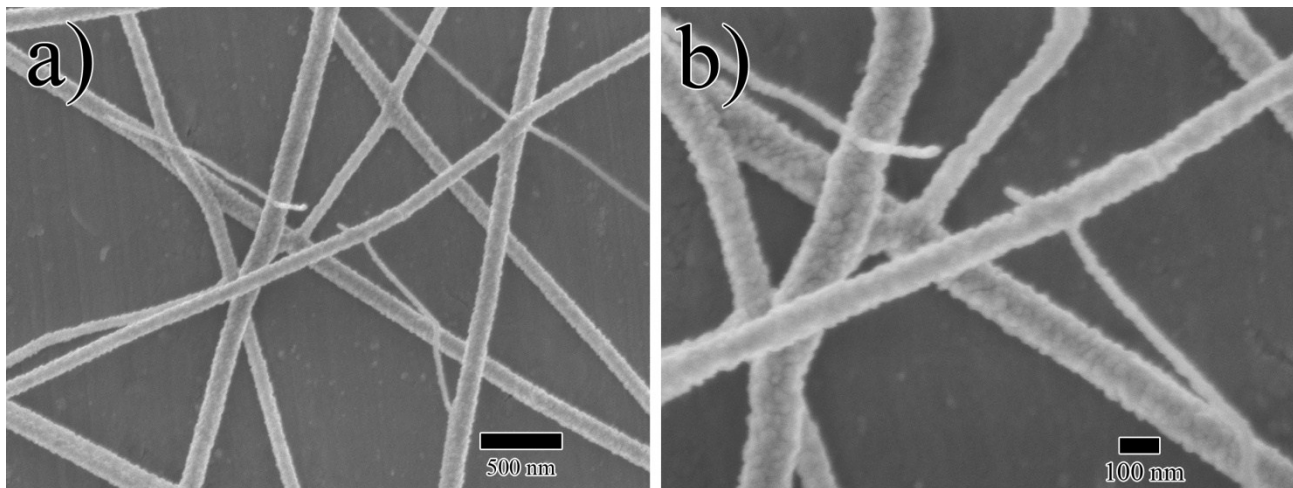

**Figure S1.** SEM images of ZnO nanofibers deposited on the surface of aluminum foil with different magnifications.

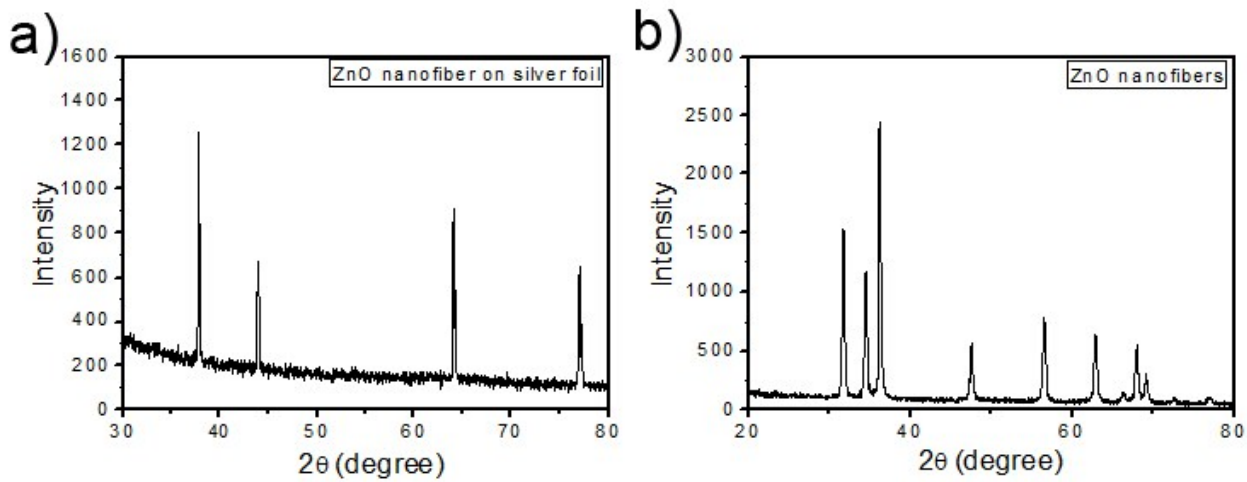

**Figure S2.** a) XRD pattern of the as-prepared ZnO nanofibers deposited on the surface of silver foil.

b) XRD pattern of the as-prepared ZnO nanofibers that obtained by peeling off the electrospun PVP/zinc acetate nanofibers from the substrate and then calcinating in air at 450°C.

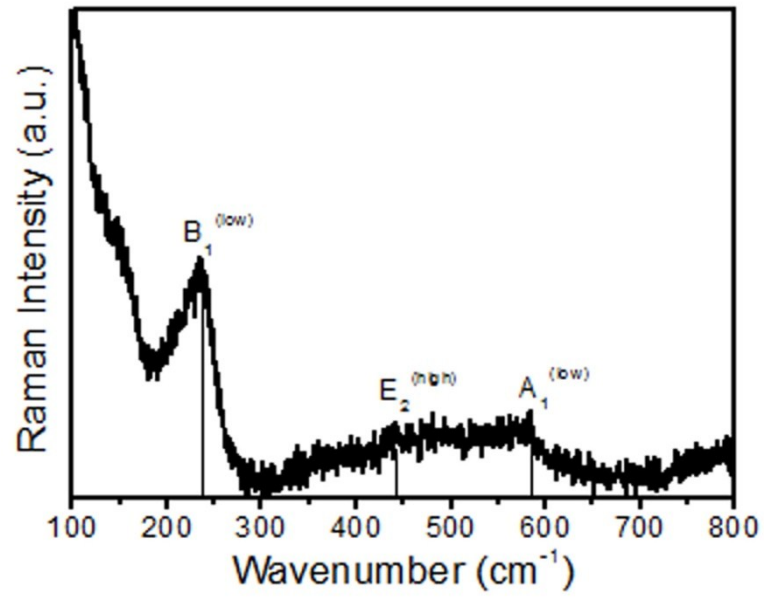

**Figure S3.** Typical Raman spectrum of ZnO nanofibers deposited on the surface of silver foil showing the characteristic peaks of wurtzite crystal phase of ZnO.

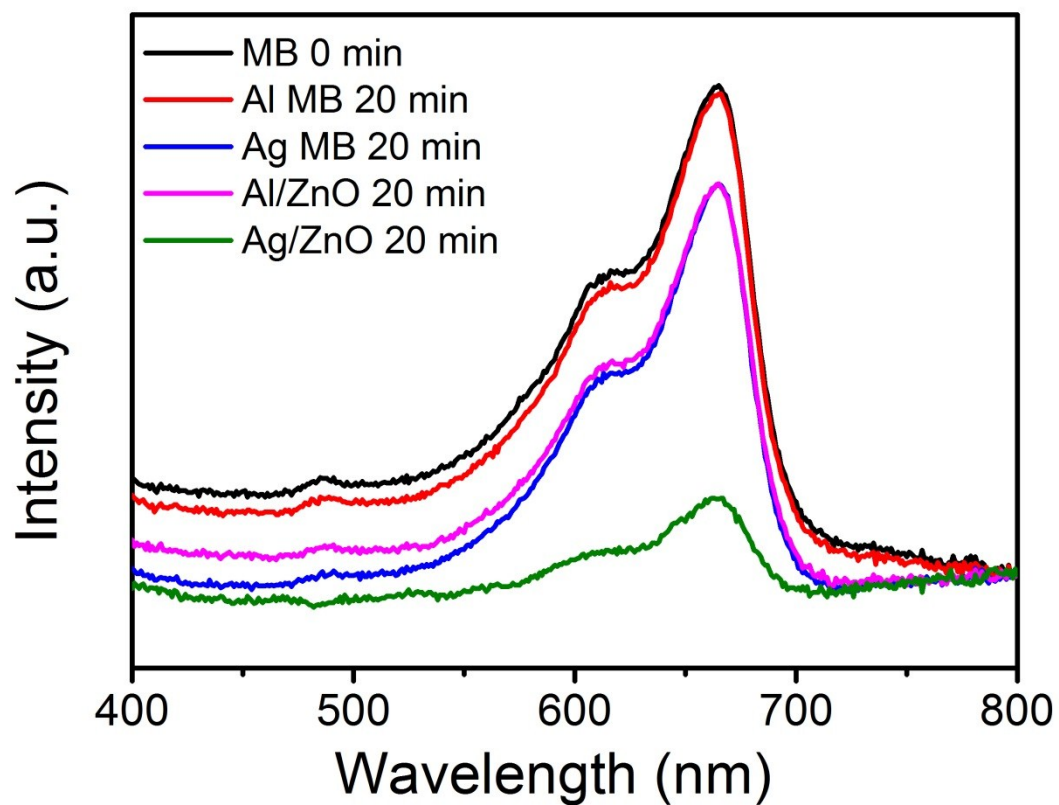

**Figure S4.** UV-vis absorbance spectra of MB solution in the presence of different kinds of photocatalysts (from top to bottom: without photocatalyst, aluminum foil, silver foil, ZnO nanofibers deposited on the surface of aluminum foil, ZnO nanofibers deposited on the surface of silver foil) after exposure to UV light for 20 min.

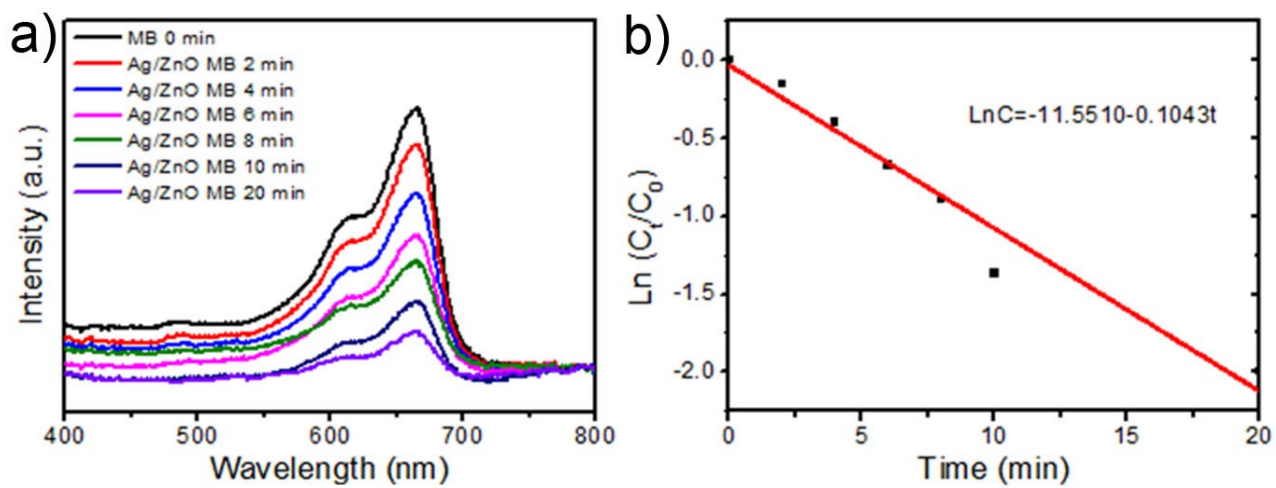

**Figure S5.** a) Time-dependent absorbance spectra of MB solution in the presence of ZnO nanofibers deposited on the surface of silver foil after exposure to UV light for different duration. b) Plot of  $\ln(C_t/C_0)$  of MB as a function of time for the photocatalytic reaction by ZnO nanofibers deposited on the surface of silver foil.

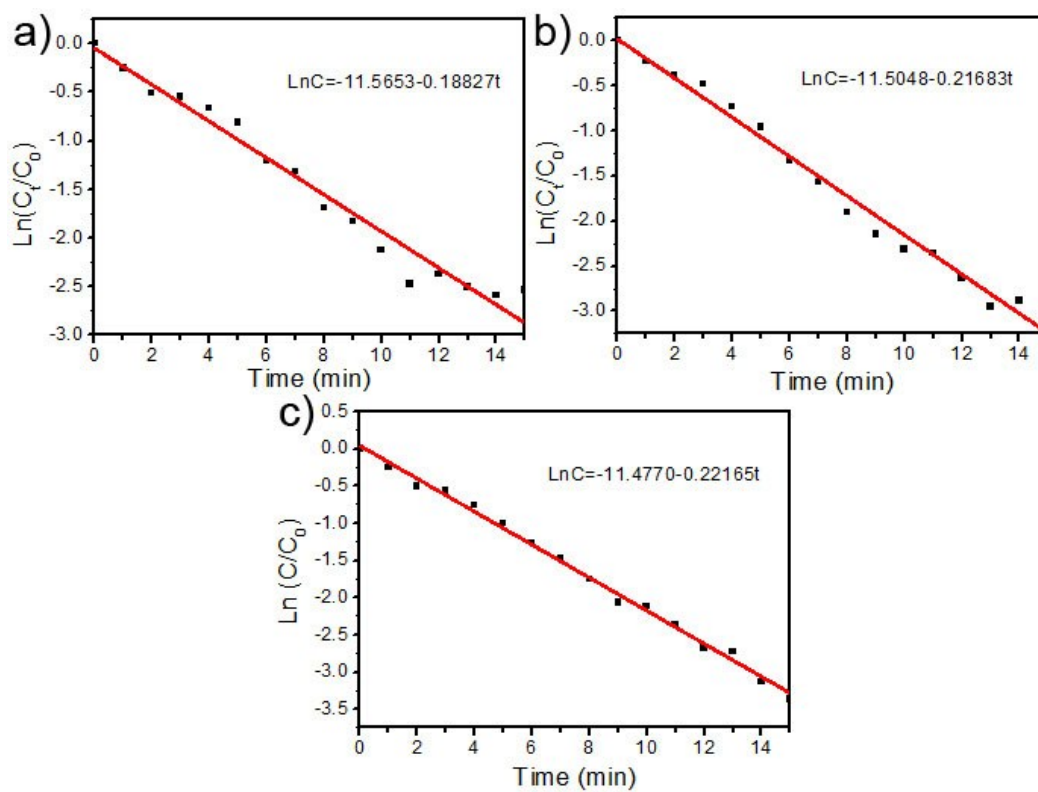

**Figure S6.** The curves of the linear relationship between the concentration of MB and the reaction time according to the bands at (b)  $453\text{ cm}^{-1}$ ,  $1031\text{ cm}^{-1}$  and (c)  $1441\text{ cm}^{-1}$ .
